# Supplementary material for: Incorporation of PEDOT:PSS into SnO2/reduced graphene oxide nanocomposite anodes for lithium-ion batteries to achieve ultra-high capacity and cyclic stability
Source: Royal Society of Chemistry journal article supplement (doi:10.1039/c4ra15913f), 2015-01-01
Supplement: c4ra15913f1.pdf [file c4ra15913f1.pdf]

Electronic supplementary information of

## Incorporation of PEDOT:PSS into SnO<sub>2</sub>/Reduced Graphene Oxide Nanocomposite Anodes for Lithium-Ion Battery to achieve Ultra-High Capacity and Cyclic Stability

Md. Selim Arif Sher Shah,<sup>‡a</sup> Shoaib Muhammad,<sup>‡b</sup> Jong Hyeok Park,<sup>ac</sup> Won-Sub Yoon<sup>\*b</sup> and Pil J. Yoo<sup>\*ac</sup>

<sup>a</sup> School of Chemical Engineering, <sup>b</sup> Department of Energy Science, <sup>c</sup> Sungkyunkwan Advanced Institute of Nanotechnology, Sungkyunkwan University, Suwon 440-746, Republic of Korea.

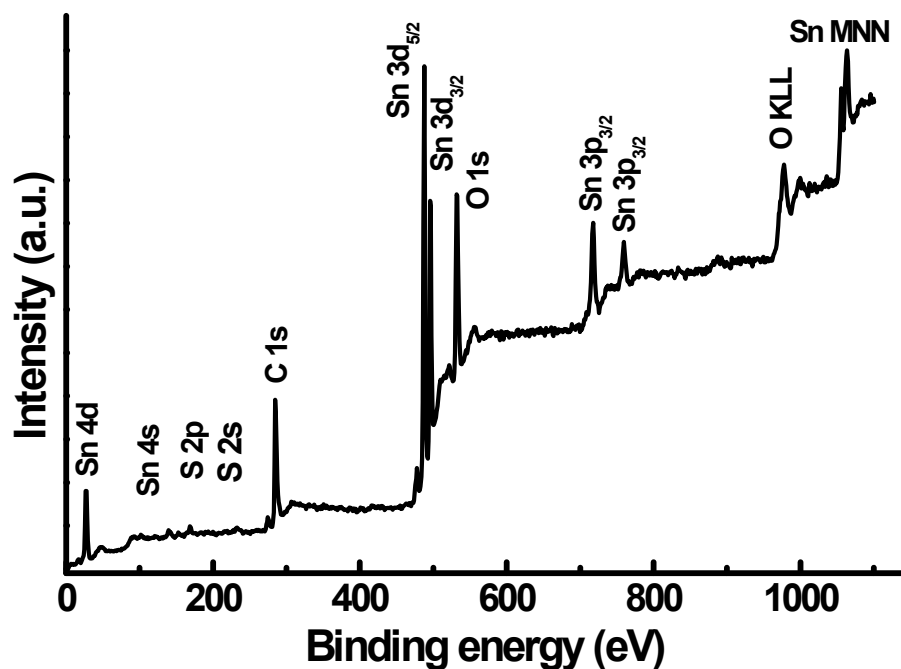

Fig. S1 Survey XPS spectrum of GSP5. It shows the composite consists of Sn, C, O and S.

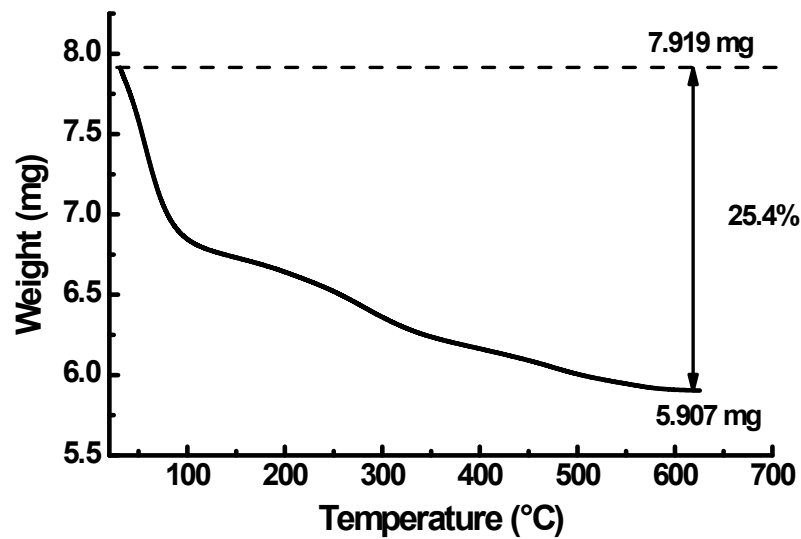

**Fig. S2** Thermo gravimetric analysis (TGA) of GSP5. It shows that the ternary nanocomposite contains 74.6 wt% SnO<sub>2</sub>.

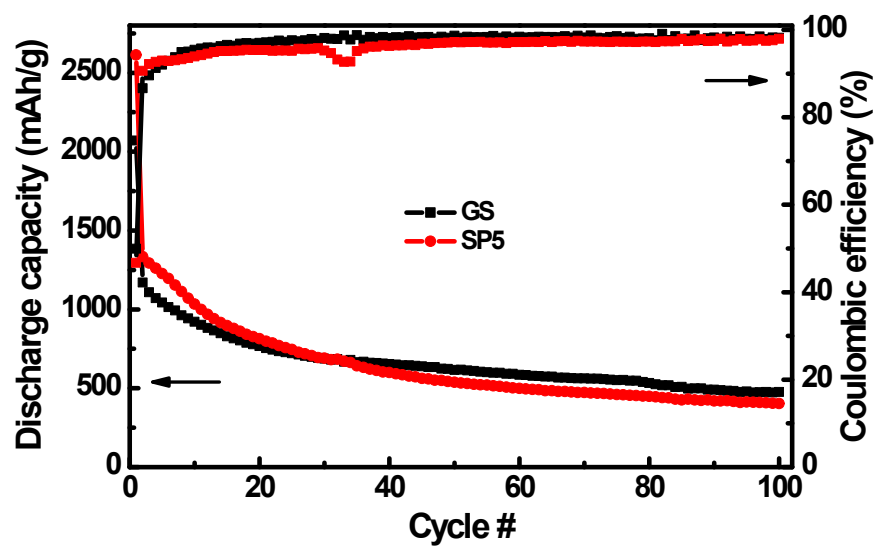

**Fig. S3** Galvanostatic cycle performance of GS and SP5.

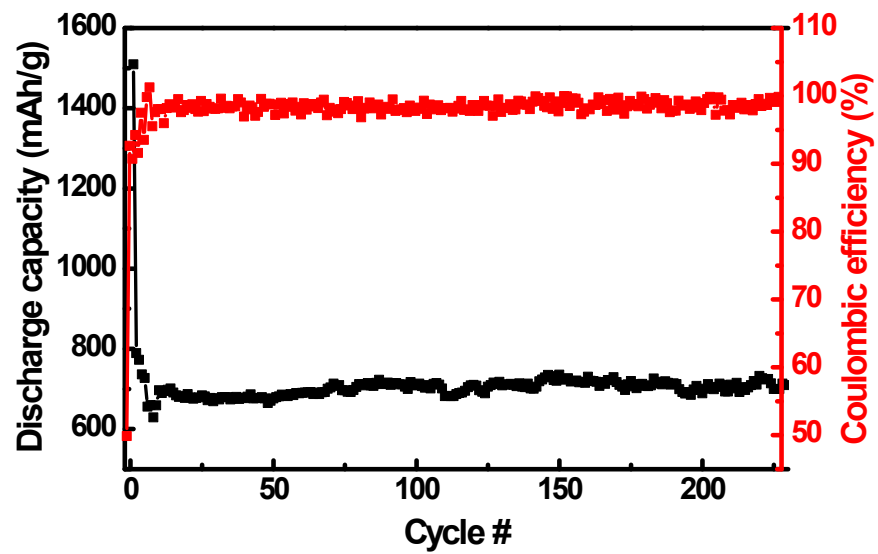

Fig. S4 Galvanostatic cycle performance and coulombic efficiency of GSP10.
